# Supplementary material
Source: HighWire-hosted journal article supplement (https://srh.bmj.com/content/bmjsrh-2020-201017)
Supplement: inline-supplementary-material-1 [file inline-supplementary-material-1.pdf]

Table S1. Participant experience, preferences and acceptability of routine monthly pregnancy self-testing and text reminders after 3 months.

|                                                                       | All participants<br>n=71 | Healthcare<br>facility<br>participants<br>n=36 | Community<br>participants<br>n=35 | P value |
|-----------------------------------------------------------------------|--------------------------|------------------------------------------------|-----------------------------------|---------|
|                                                                       | n (%)                    | n (%)                                          | n (%)                             |         |
| Tests were easy to do                                                 | 66 (93.0)                | 35 (97.2)                                      | 31 (88.6)                         | 0.154   |
| Problems with privacy<br>when testing                                 | 3 (4.2)                  | 2 (5.6)                                        | 1 (2.9)                           | 0.572   |
| Test results were easy<br>to understand                               | 70 (98.6)                | 36 (100.0)                                     | 34 (97.1)                         | 0.307   |
| A test result was<br>surprising                                       | 24 (33.8)                | 7 (19.4)                                       | 17 (48.6)                         | 0.009   |
| Interested in continuing<br>to test monthly, given<br>with free tests |                          |                                                |                                   | 0.606   |
| Yes                                                                   | 63 (88.7)                | 31 (86.1)                                      | 32 (91.4)                         |         |
| No                                                                    | 4 (5.6)                  | 2 (5.6)                                        | 2 (5.7)                           |         |
| Not sure                                                              | 4 (5.6)                  | 3 (8.3)                                        | 1 (2.9)                           |         |
| Would recommend<br>monthly testing to a<br>friend                     | 70 (98.6)                | 35 (97.2)                                      | 35 (100.0)                        | 0.321   |
| Text messages were<br>bothersome *                                    |                          |                                                |                                   | 0.868   |
| Yes, very, somewhat                                                   | 12 (17.4)                | 6 (16.7)                                       | 6 (18.2)                          |         |
| No                                                                    | 57 (82.6)                | 30 (83.3)                                      | 27 (81.8)                         |         |

\* 2 missing records
